# Supplementary material
Source: PubMed Central journal article supplement (PMC3894691)

Table S1.

### Production of Individual Fatty Acids

| Temperature | Transformation         | Fatty acid methyl esters<br>( mg Fatty Acid / L Culture ) |                |                  |                  |                 |                  |                |                | UFA:S<br>FA |
|-------------|------------------------|-----------------------------------------------------------|----------------|------------------|------------------|-----------------|------------------|----------------|----------------|-------------|
|             |                        | 12:0                                                      | 14:0           | 16:1             | 16:0             | 17:1            | 18:1             | 18:0           | 19:1           |             |
| 16 °C       | pET200/D/lacZ<br>(n=2) | 0.32 ±<br>0.05                                            | 2.27 ±<br>0.94 | 8.08 ±<br>0.89   | 21.46 ±<br>3.04  | 5.27 ±<br>1.52  | 20.91 ±<br>0.45  | 0.35 ±<br>0.02 | 0.97 ±<br>0.28 | 1.4         |
|             | pDH1-DH2-UMA<br>(n=2)  | 1.81 ±<br>1.12                                            | 8.86 ±<br>2.83 | 37.66 ±<br>10.72 | 83.67 ±<br>28.76 | 17.66 ±<br>6.91 | 73.85 ±<br>31.03 | 1.41 ±<br>0.92 | 2.63 ±<br>1.44 | 1.4         |
| 22 °C       | pET200/D/lacZ<br>(n=3) | 0.21 ±<br>0.04                                            | 0.63 ±<br>0.40 | 3.79 ±<br>1.52   | 12.06 ±<br>4.84  | 1.30 ±<br>0.50  | 14.72 ±<br>6.73  | 0.25 ±<br>0.15 | 0.21 ±<br>0.08 | 1.5         |
|             | pDH1-DH2-UMA<br>(n=2)  | 0.70 ±<br>0.02                                            | 4.54 ±<br>0.80 | 13.34 ±<br>2.67  | 46.18 ±<br>6.67  | 4.97 ±<br>1.01  | 44.18 ±<br>4.54  | 0.85 ±<br>0.12 | 0.58 ±<br>0.09 | 1.2         |
| 30 °C       | pET200/D/lacZ<br>(n=3) | 0.10 ±<br>0.03                                            | 0.53 ±<br>0.08 | 1.33 ±<br>0.40   | 6.39 ±<br>1.11   | 1.83 ±<br>0.41  | 3.90 ±<br>0.87   | 0.08 ±<br>0.02 | 0.85 ±<br>0.30 | 1.1         |
|             | pDH1-DH2-UMA<br>(n=2)  | 0.10 ±<br>0.06                                            | 0.60 ±<br>0.11 | 1.88 ±<br>0.90   | 9.30 ±<br>2.25   | 2.61 ±<br>0.36  | 7.17 ±<br>3.00   | 0.13 ±<br>0.05 | 0.76 ±<br>0.18 | 1.2         |

Table S2.

| Production of Individual Fatty Acids |                     |                                                           |              |              |               |              |               |             |              |          |
|--------------------------------------|---------------------|-----------------------------------------------------------|--------------|--------------|---------------|--------------|---------------|-------------|--------------|----------|
| Experimental Condition               | Transformant        | Fatty acid methyl esters<br>( mg Fatty Acid / L Culture ) |              |              |               |              |               |             |              |          |
|                                      |                     | 12:0                                                      | 14:0         | 16:1         | 16:0          | 17:1         | 18:1          | 18:0        | 19:1         | UFA:S FA |
| No Glycerol                          | pET200/D/lacZ (n=3) | 0.08 ± 0.04                                               | 0.72 ± 0.17  | 3.05 ± 0.69  | 6.73 ± 1.41   | 0.70 ± 0.17  | 4.81 ± 1.42   | 0.19 ± 0.08 | 0.10 ± 0.05  | 1.1      |
|                                      | pDH1-DH2-UMA (n=3)  | 2.42 ± 1.89                                               | 6.08 ± 3.73  | 15.57 ± 7.90 | 34.01 ± 16.22 | 3.30 ± 1.71  | 17.85 ± 7.57  | 0.75 ± 0.58 | 0.34 ± 0.22  | 0.9      |
| 0.4 % Glycerol                       | pET200/D/lacZ (n=3) | 0.21 ± 0.04                                               | 0.63 ± 0.40  | 3.79 ± 1.52  | 12.06 ± 4.84  | 1.30 ± 0.50  | 14.72 ± 6.73  | 0.25 ± 0.15 | 0.21 ± 0.08  | 1.5      |
|                                      | pDH1-DH2-UMA (n=2)  | 0.70 ± 0.02                                               | 4.54 ± 0.80  | 13.34 ± 2.67 | 46.18 ± 6.67  | 4.97 ± 1.01  | 44.18 ± 4.54  | 0.85 ± 0.12 | 0.58 ± 0.09  | 1.2      |
| No IPTG                              | pET200/D/lacZ (n=2) | 0.99 ± 0.25                                               | 11.27 ± 1.72 | 1.83 ± 0.60  | 46.66 ± 0.03  | 22.81 ± 0.30 | 17.49 ± 7.32  | 0.47 ± 0.09 | 16.25 ± 0.42 | 1.0      |
|                                      | pDH1-DH2-UMA (n=2)  | 2.19 ± 1.25                                               | 15.41 ± 4.81 | 5.24 ± 0.75  | 76.20 ± 10.59 | 27.80 ± 1.86 | 42.25 ± 16.23 | 0.86 ± 0.28 | 12.58 ± 1.04 | 1.1      |
| 1 mM IPTG                            | pET200/D/lacZ (n=3) | 0.21 ± 0.04                                               | 0.63 ± 0.40  | 3.79 ± 1.52  | 12.06 ± 4.84  | 1.30 ± 0.50  | 14.72 ± 6.73  | 0.25 ± 0.15 | 0.21 ± 0.08  | 1.5      |
|                                      | pDH1-DH2-UMA (n=2)  | 0.70 ± 0.02                                               | 4.54 ± 0.80  | 13.34 ± 2.67 | 46.18 ± 6.67  | 4.97 ± 1.01  | 44.18 ± 4.54  | 0.85 ± 0.12 | 0.58 ± 0.09  | 1.2      |

Supplementary figure 1

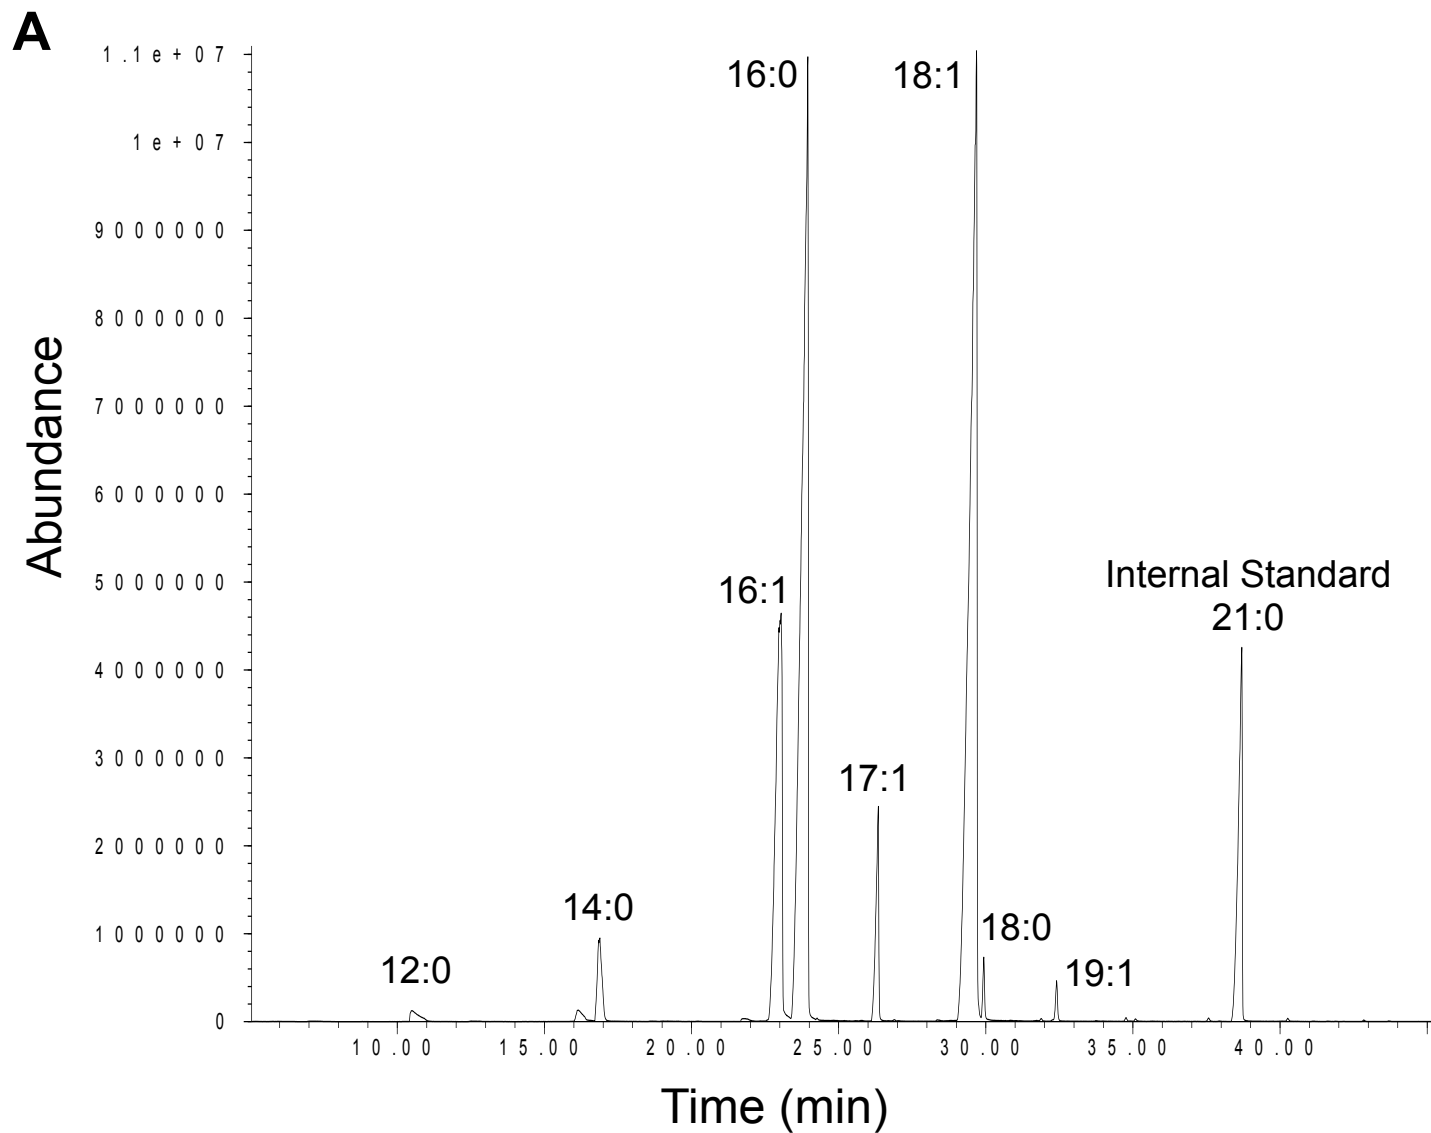

# Supplementary figure 1

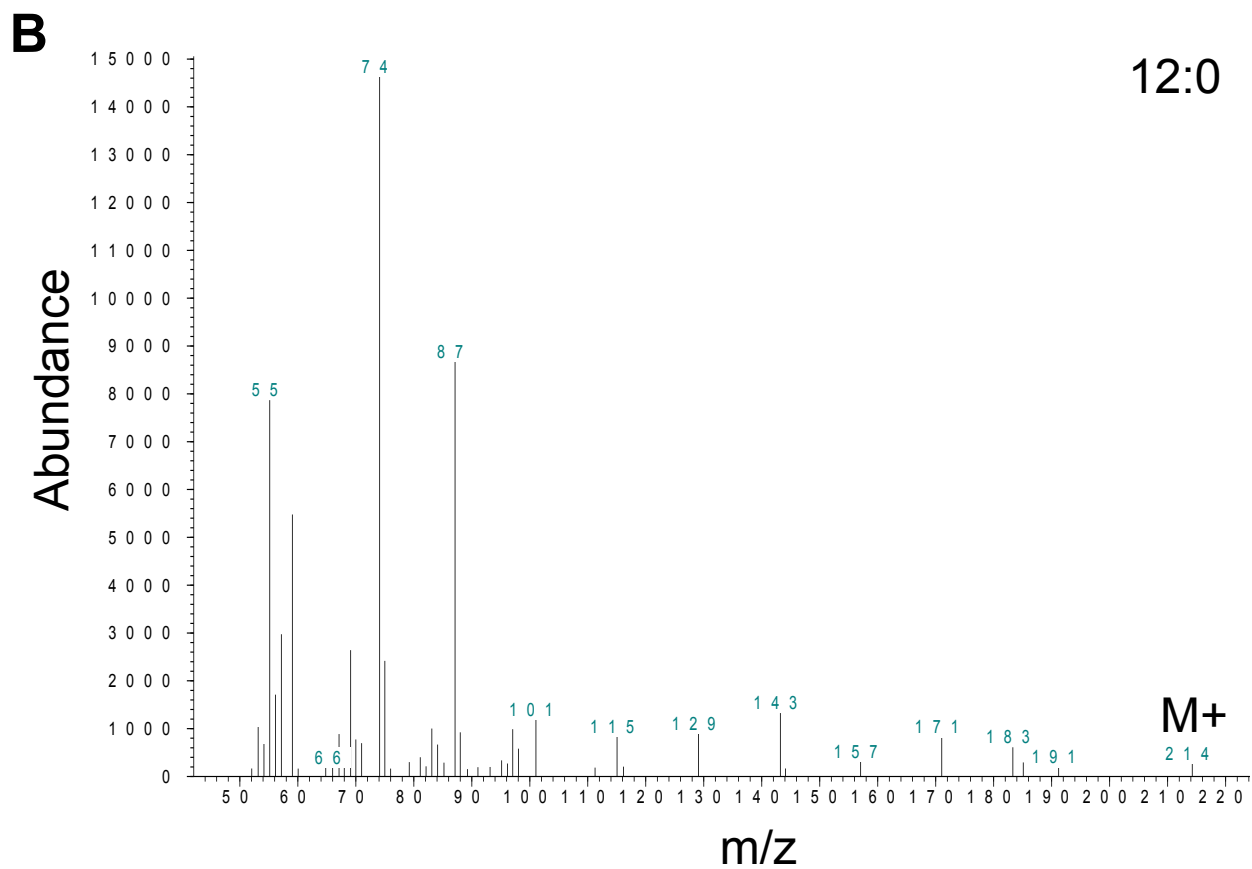

Supplementary figure 1

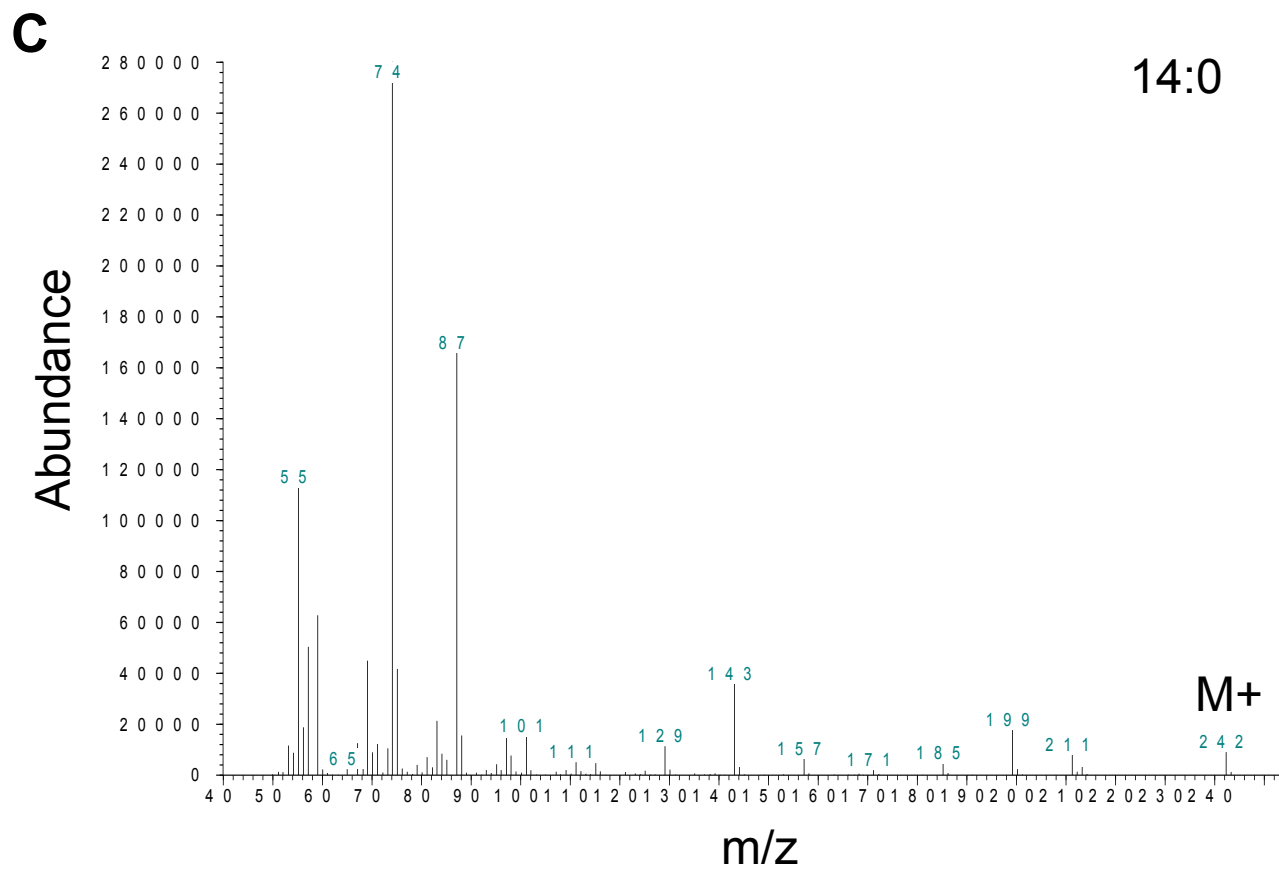

# Supplementary figure 1

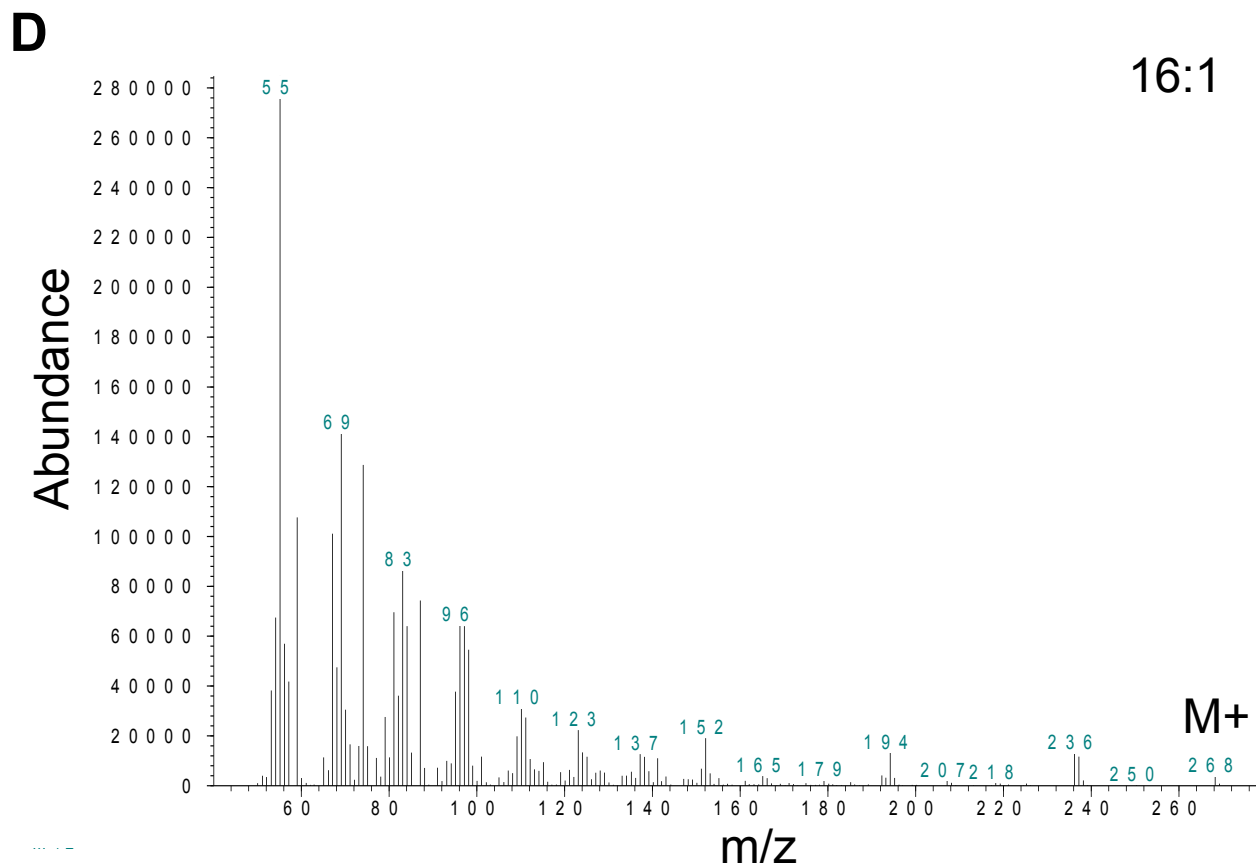

Supplementary figure 1

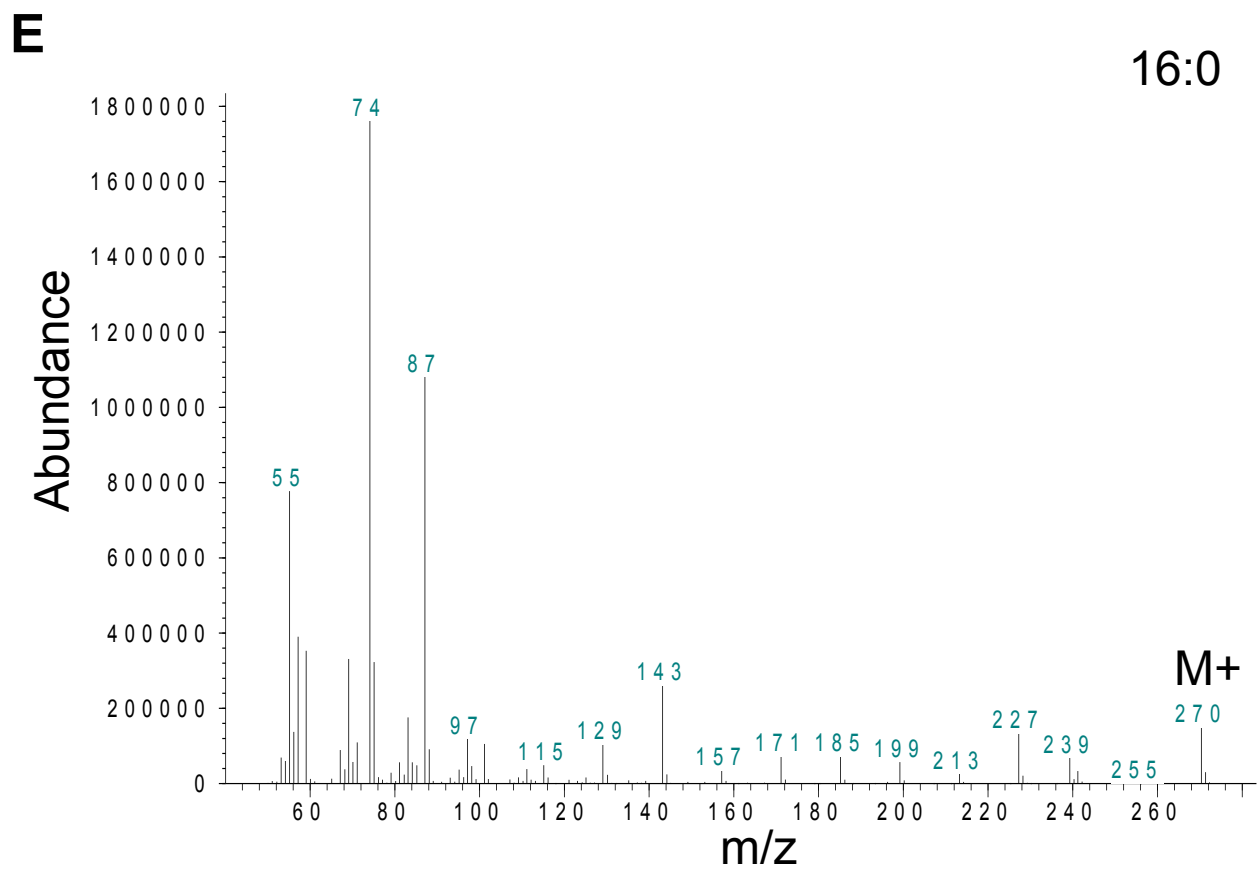

Supplementary figure 1

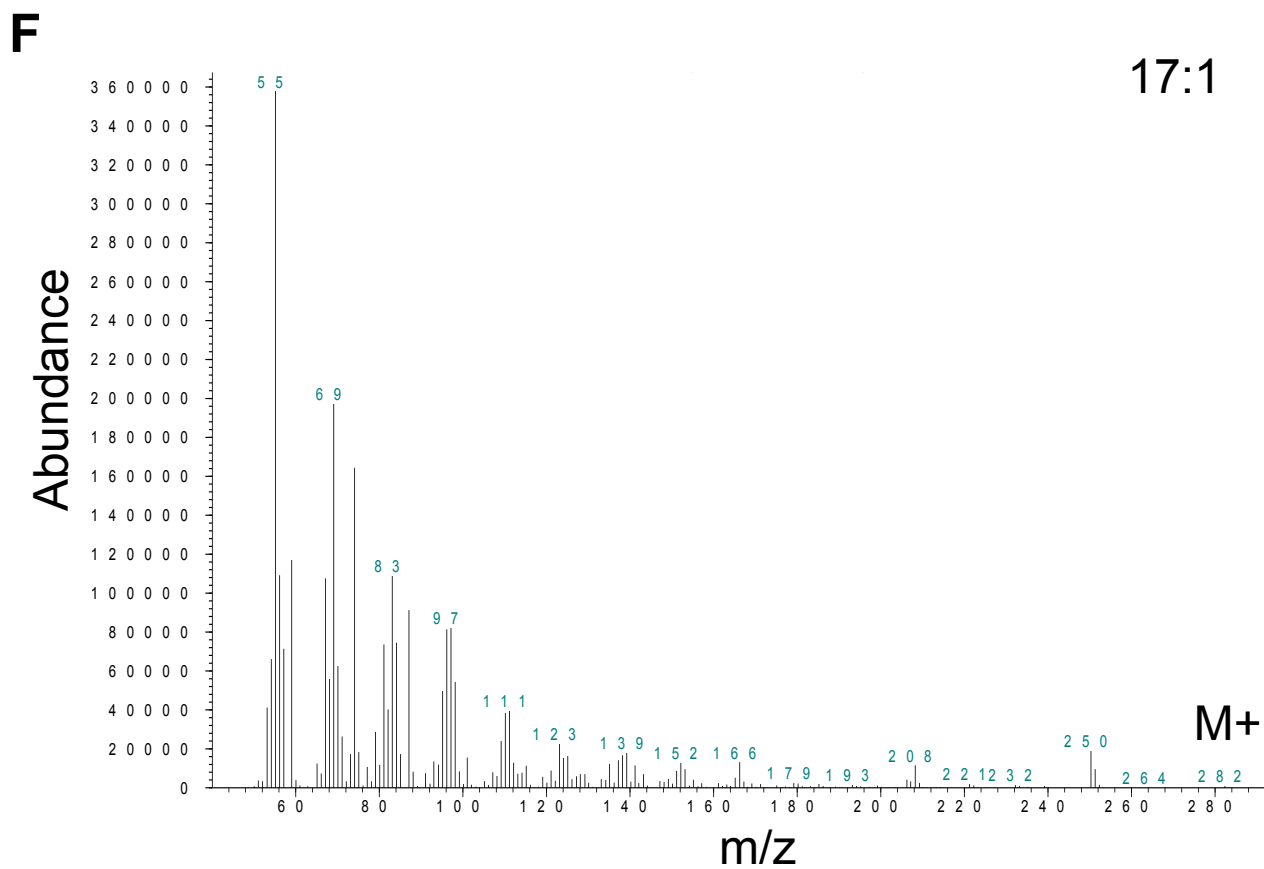



# Supplementary figure 1

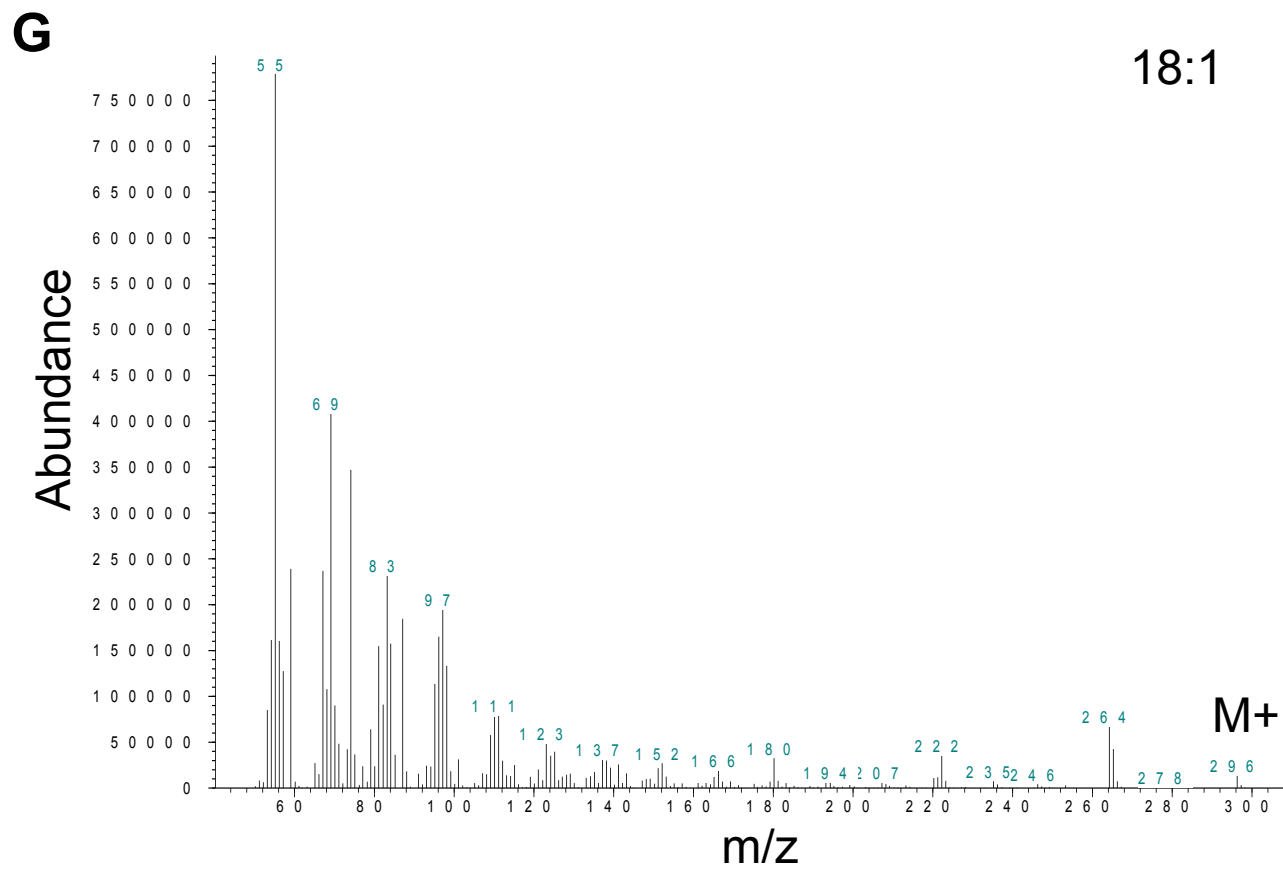

Supplementary figure 1

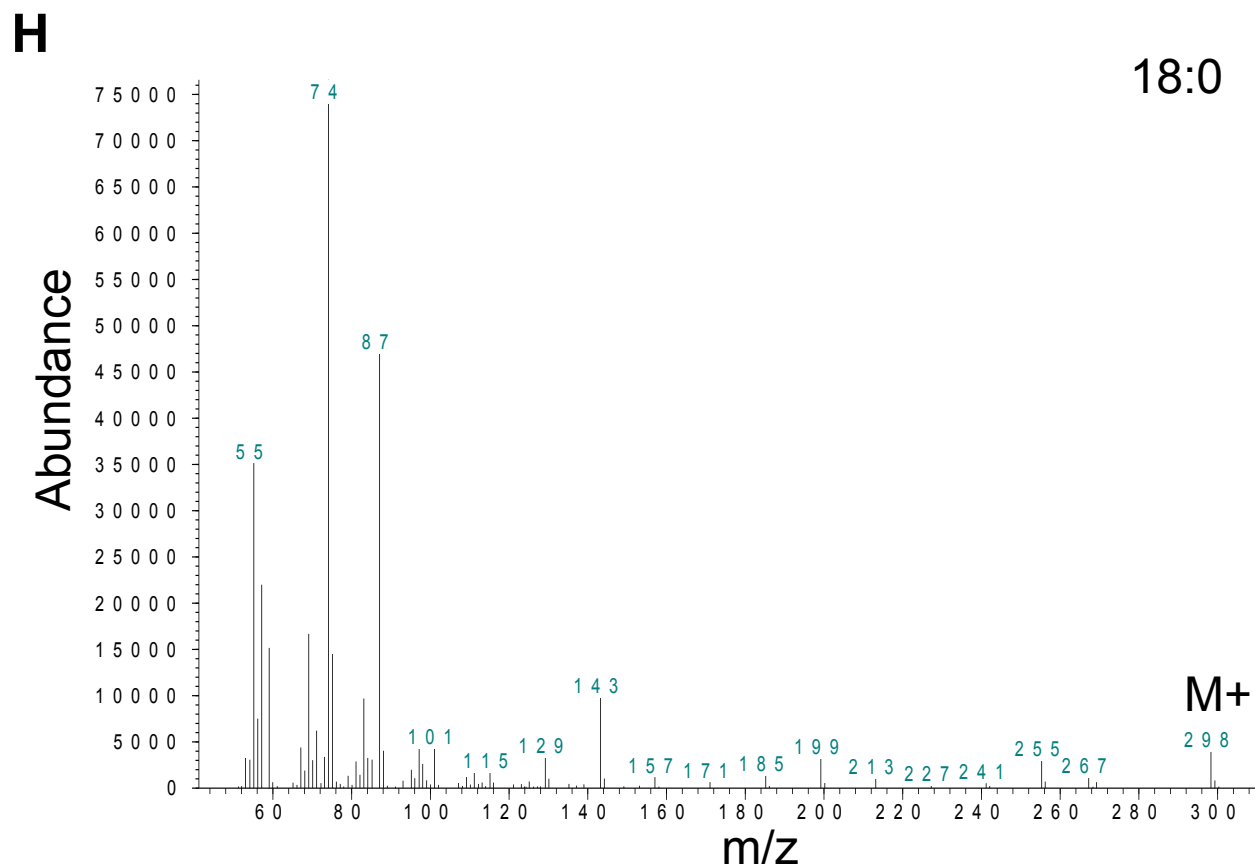

# Supplementary figure 1

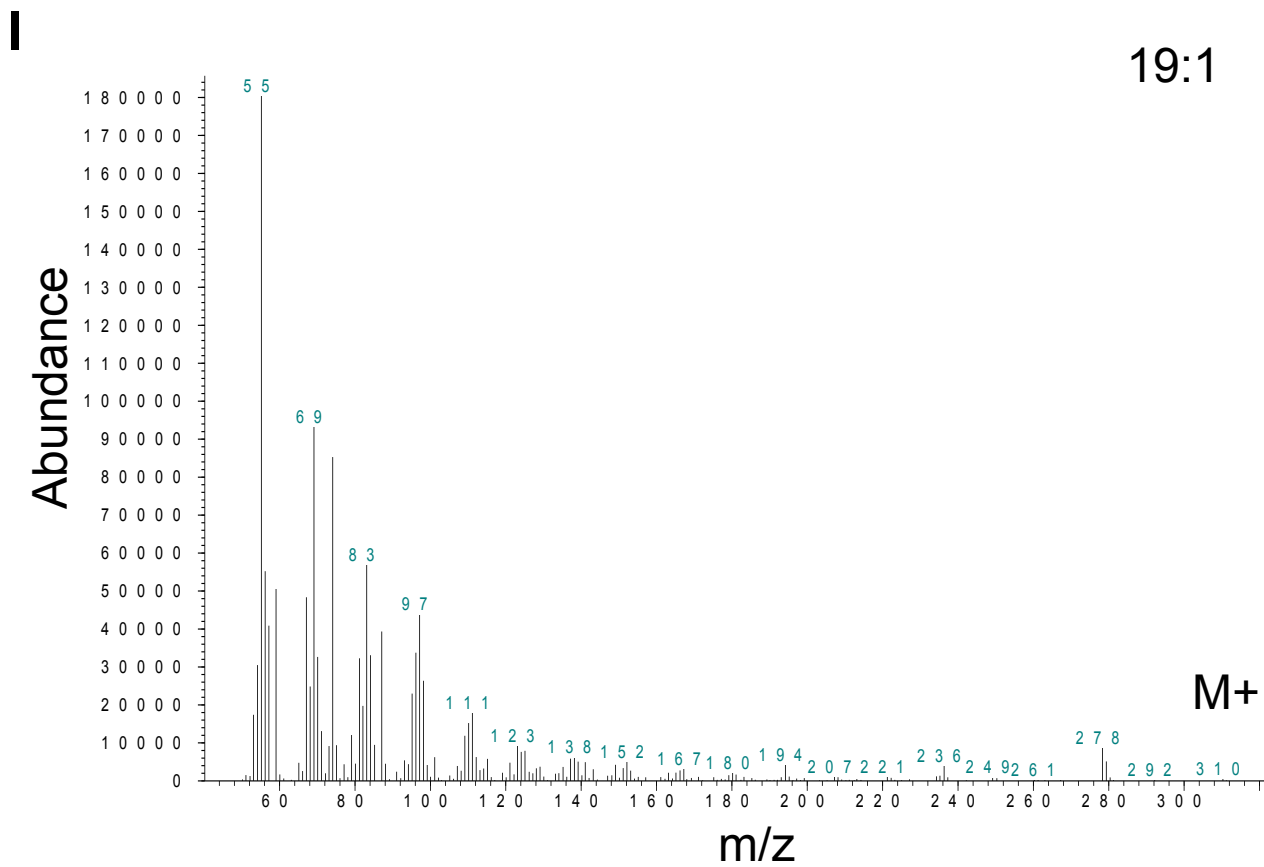

Supplement: NIHMS541216-supplement-01.pdf [file NIHMS541216-supplement-01.pdf]
